# Supplementary material for: Does Glucose Variability Influence the Relationship Between Mean Plasma Glucose and HbA1c Levels in Type 1 and Type 2 Diabetic Patients?
Source: PubMed Central journal article supplement — Diabetes Care. 2011 Jul 16;34(8):1843–7. doi: 10.2337/dc10-2217 (PMC3142023; doi:10.2337/dc10-2217), 2011-07-16
Supplement: supp_dc10-2217v102217_DC102217SupplementaryData.pdf [file supp_dc10-2217v102217_DC102217SupplementaryData.pdf]

## SUPPLEMENTARY DATA

### **The ADAG Study Group**

#### **Study centers:**

##### **Amsterdam, the Netherlands:**

J.C. Kuenen (Principle Investigator [PI]), G.S.M.A. Kerner, and A. van Iperen.

##### **Boston, MA, USA:**

E. Horton (PI), A. Cohen, S. Herzlinger-Botein, and J. Paradis.

##### **Baltimore, MD, USA:**

C. Saudek (PI), K. Moore, A. Greene, and M. Islas.

##### **Copenhagen, Denmark:**

J. Nerup (PI), R. Borg, and C. Glümer.

##### **Padova, Italy:**

A. Mosca (co-PI), A. Lapolla (co-PI), D. Fedele, and G. Sartore.

##### **New York, NY, USA:**

X. Pi-Sunyer (PI), C. Maggio, L. Haselman, and C. Bellino.

##### **Rochester, MN, USA:**

S. Smith (PI), A. Reynolds, T. Robertson, H. Binner, and K. Hurtis.

##### **San Antonio, TX, USA:**

S. Schwartz (PI), A. Ramos, A. Gonzales, A. Childress, and Y. Martinez.

##### **Seattle, WA, USA:**

I. Hirsch (PI), D. Khakpour, and C. Farricker.

##### **Yaounde', Cameroon:**

J.C. Mbanya (PI), E. Sobngwi, and E. Balti.

##### **Central laboratory, Zwolle, the Netherlands:**

R. Slingerland (PI), E. Lenters, and H.P van Berkel.

##### **Biostatistics center, Boston, MA, USA:**

D. Schoenfeld (PI), H. Zheng, K. Pelak, and R. Wilson.

##### **Coordinating center, Boston, MA, USA:**

D.M. Nathan (PI), N. Kingori, and H. Turgeon.

##### **Study chairs:**

R.J. Heine and D.M. Nathan.
